# Supplementary material for: Krüppel‐Like Factors Orchestrate Endothelial Gene Expression Through Redundant and Non‐Redundant Enhancer Networks
Source: PubMed Central journal article supplement — J Am Heart Assoc. 2023 Feb 15;12(4):e024303. doi: 10.1161/JAHA.121.024303 (PMC10111506; doi:10.1161/jaha.121.024303), 2023-02-15
Supplement: JAH3-12-e024303-s001.pdf [file JAH3-12-e024303-s001.pdf]

# **SUPPLEMENTAL MATERIAL**

Figure S1. Models of KLF2 and KLF4 tagged mice.

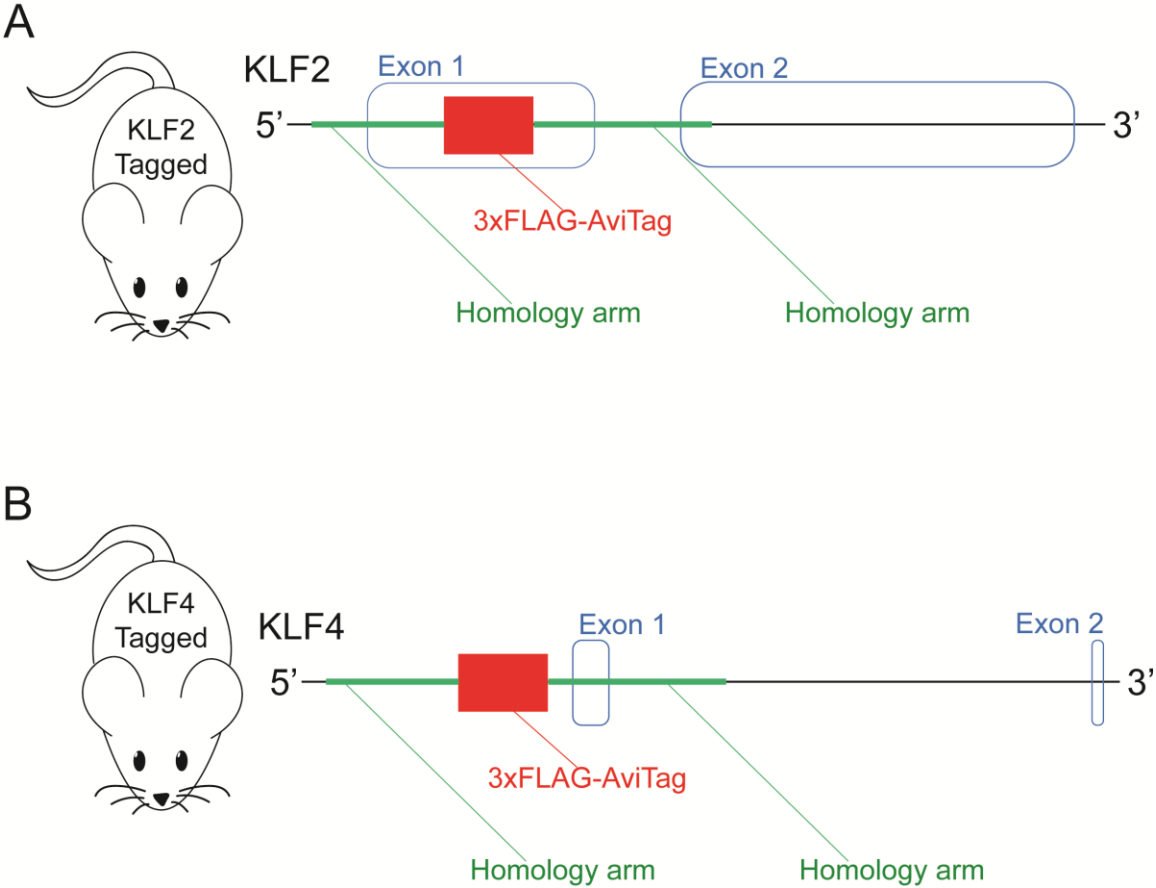

(A) Depiction of 3xFLAG-AviTag cassette insertion into the endogenous KLF2 locus. (B) Depiction of 3xFLAG-AviTag cassette insertion into the endogenous KLF4 locus.

Figure S2. Confirmation of changes in transcription due to loss of KLF2 and KLF4 in lung ECs.

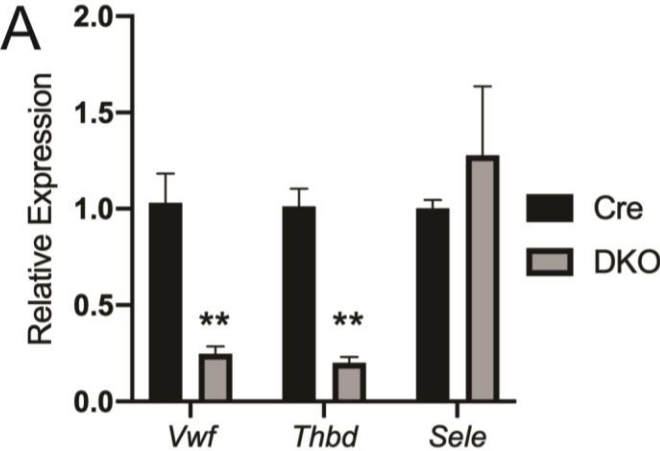

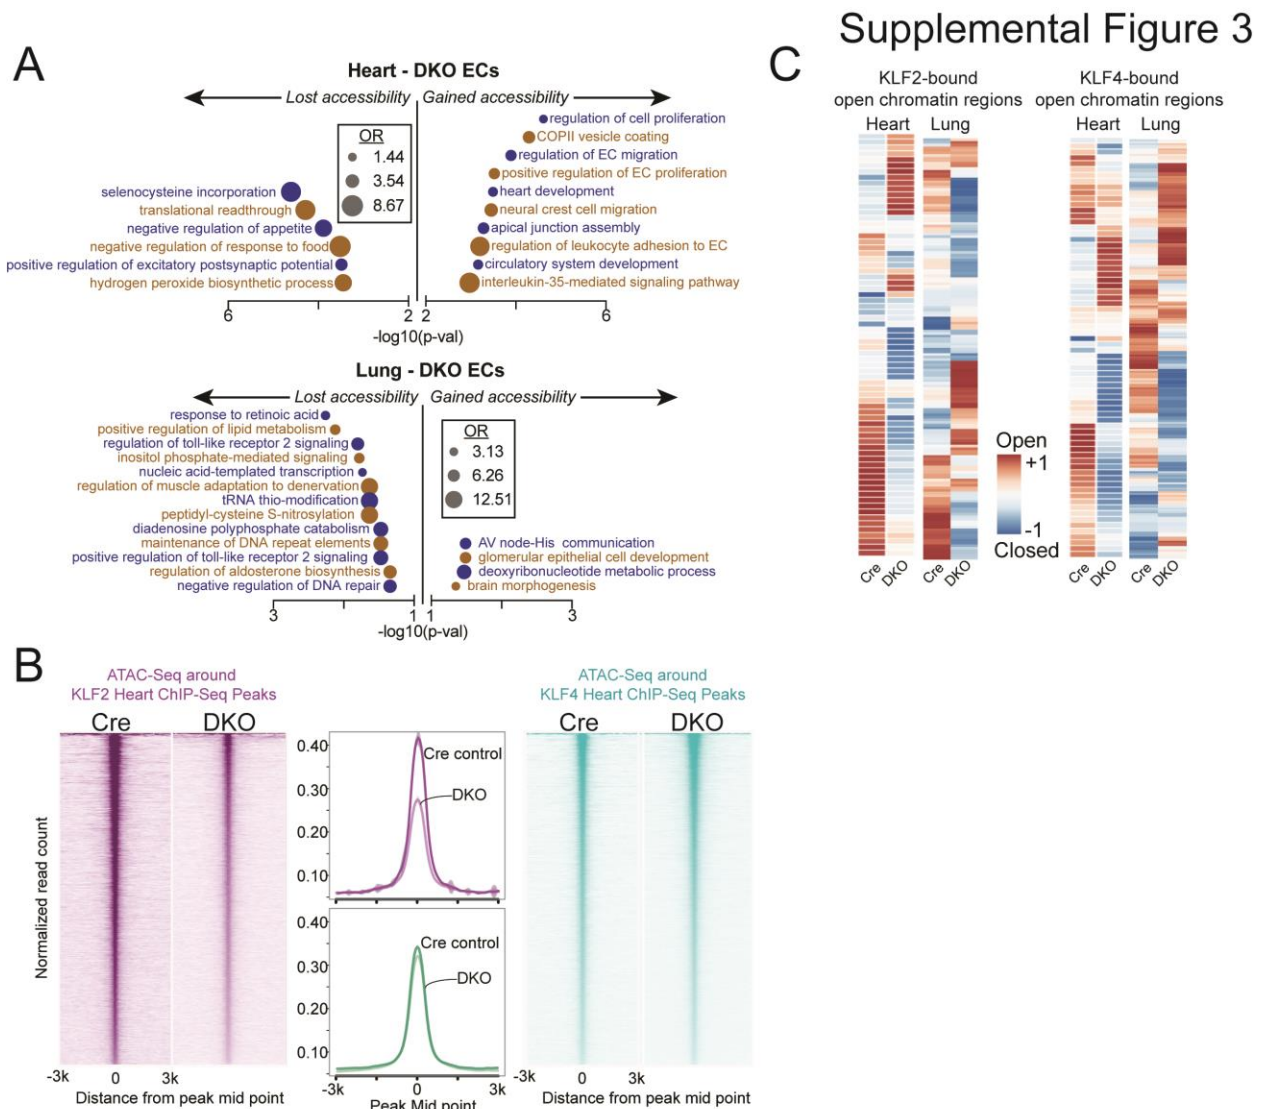

**Supplemental Figure 3: Endothelial KLFs increase chromatin accessibility with factor-specific bias.** **(A)** Gene ontology biological process (GO BP) for regions with gained/lost accessibility in heart and lung DKO ECs. Node size corresponds to odds ratio (OR) of computed mean rank of geneset compared to those of several random genesets (EnrichR). **(B)** Heatmap of ATAC-seq reads from Cre and DKO plotted with respect to corresponding ChIP-seq peak midpoints in heart (KLF2 in magenta, KLF4 in teal). Composite plots quantify the occupancy (reads) in a  $\pm 3$ kb window from peak midpoints. **(C)** Heatmaps showing KLF2- and KLF4-bound open (red) and closed (blue) regions in Cre compared to DKO in heart and lung ECs.

**Figure S4. Comparative assessment of heart and lung EC enhancers.**

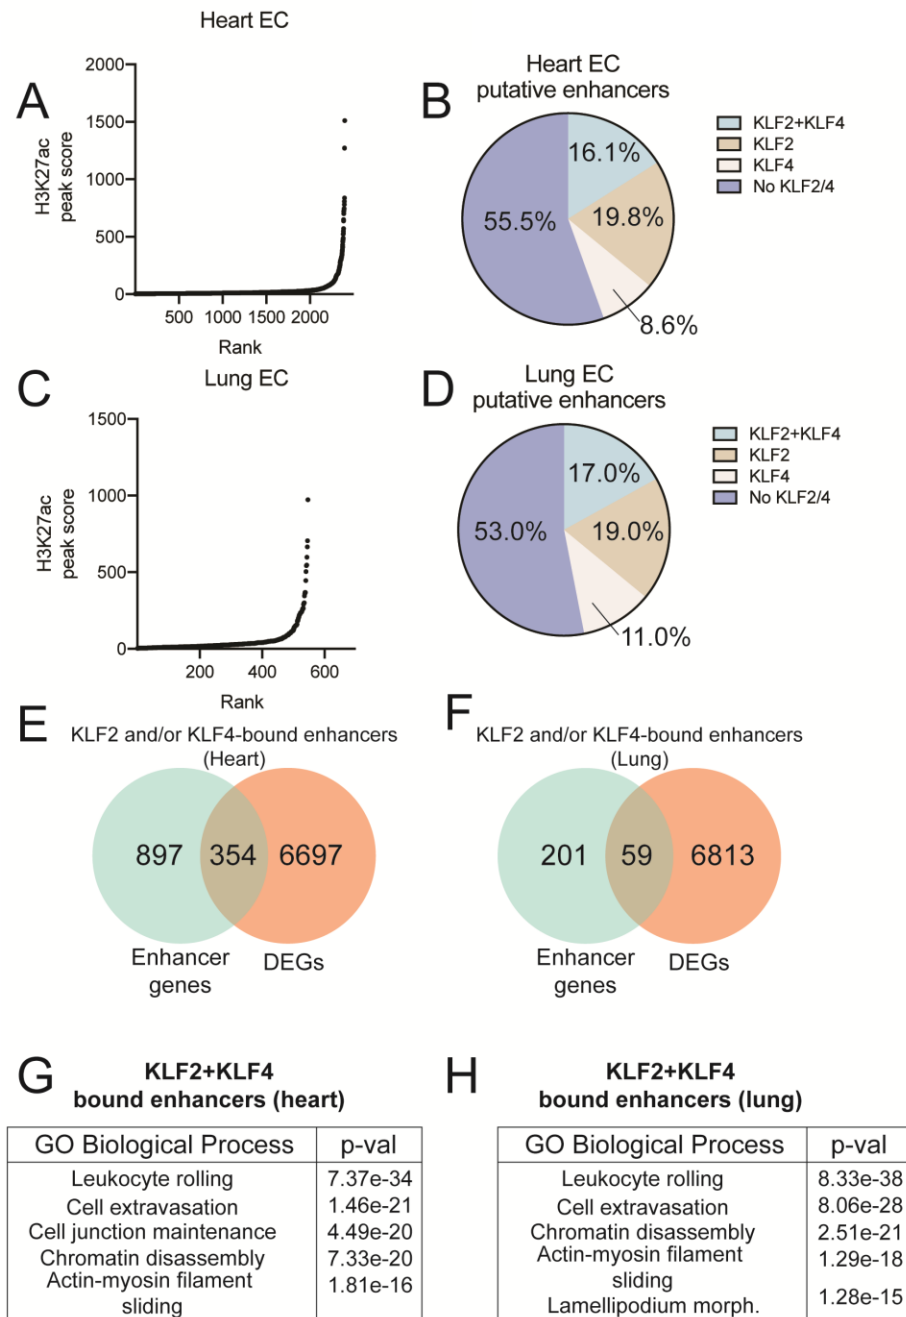

**(A, C)** Hockey stick plot depicting called putative enhancer peaks in heart and lung ECs (from Cre mice). **(B, D)** Proportion of heart/lung enhancers bound by KLF2, KLF4, or KLF2+KLF4. **(E)** Differential expression of genes associated with enhancers with KLF2 and/or KLF4 bound in heart and **(F)** lung. These represent any enhancer with at least one of these two factors present. **(G)** Functional enrichment of gene ontology (GO) biological process terms of genes associated with KLF2+KLF4-bound enhancers in heart and **(H)** lung.
